# Supplementary material for: Banana Mapping in Heterogenous Smallholder Farming Systems Using High-Resolution Remote Sensing Imagery and Machine Learning Models with Implications for Banana Bunchy Top Disease Surveillance
Source: MDPI journal article supplement (doi:10.3390/rs14205206), 2022-10-18
Supplement: s1 [file s1]

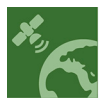

## Supplementary Materials

Table S1. Description of vegetation indices.

| Index  | Description                                  | Formula                                                                                                                                                                                                                                                                                   | Reference |
|--------|----------------------------------------------|-------------------------------------------------------------------------------------------------------------------------------------------------------------------------------------------------------------------------------------------------------------------------------------------|-----------|
| CLG    | Green Band Chlorophyll Index                 | $\text{redEdge3}/\text{green} - 1$                                                                                                                                                                                                                                                        | [61]      |
| CLRE   | Red-Edge Band Chlorophyll Index              | $\text{redEdge3}/\text{redEdge1} - 1$                                                                                                                                                                                                                                                     | [61]      |
| CTVI*  | Corrected Transformed Vegetation Index       | $(\text{NDVI} + 0.5)/\sqrt{\text{abs}(\text{NDVI} + 0.5)}$                                                                                                                                                                                                                                | [62]      |
| DVI    | Difference Vegetation Index                  | $s * \text{nir} - \text{red}$                                                                                                                                                                                                                                                             | [63]      |
| EVI    | Enhanced Vegetation Index                    | $G * ((\text{nir} - \text{red})/(\text{nir} + C1 * \text{red} - C2 * \text{blue} + L_{\text{evi}}))$                                                                                                                                                                                      | [64]      |
| GEMI   | Global Environmental Monitoring Index        | $((\text{nir}^2 - \text{red}^2) * 2 + (\text{nir} * 1.5) + (\text{red} * 0.5))/(\text{nir} + \text{red} + 0.5) * (1 - (((\text{nir}^2 - \text{red}^2) * 2 + (\text{nir} * 1.5) + (\text{red} * 0.5))/(\text{nir} + \text{red} + 0.5)) * 0.25)) - ((\text{red} - 0.125)/(1 - \text{red}))$ | [65]      |
| GCVI*  | Green Chlorophyll Vegetation Index           | $(\text{nir}/\text{green}) - 1$                                                                                                                                                                                                                                                           | [66]      |
| GNDVI* | Green Normalized Difference Vegetation Index | $(\text{nir} - \text{green})/(\text{nir} + \text{green})$                                                                                                                                                                                                                                 | [67]      |
| MCARI* | Modified Chlorophyll Absorption Ratio Index  | $((\text{redEdge} - \text{red}) - (\text{redEdge} - \text{green})) * (\text{redEdge}/\text{red})$                                                                                                                                                                                         | [68]      |
| MNDWI  | Modified Normalized Difference Water Index   | $(\text{green} - \text{swir2})/(\text{green} + \text{swir2})$                                                                                                                                                                                                                             | [69]      |
| MSAVI* | Modified Soil-Adjusted Vegetation Index      | $\text{nir} + 0.5 - (0.5 * \sqrt{(2 * \text{nir} + 1)^2 - 8 * (\text{nir} - (2 * \text{red}))})$                                                                                                                                                                                          | [70]      |
| MSAVI2 | Modified Soil-Adjusted Vegetation Index 2    | $(2 * (\text{nir} + 1) - \sqrt{(2 * \text{nir} + 1)^2 - 8 * (\text{nir} - \text{red})})/2$                                                                                                                                                                                                | [70]      |
| NBRI   | Normalized Burn Ratio Index                  | $(\text{nir} - \text{swir3})/(\text{nir} + \text{swir3})$                                                                                                                                                                                                                                 | [71]      |
| NDRE*  | Normalized Difference Red Edge Index         | $(\text{nir} - \text{redEdge})/(\text{nir} + \text{redEdge})$                                                                                                                                                                                                                             | [72]      |
| NDREI1 | Normalized Difference Red Edge Index 1       | $(\text{redEdge2} - \text{redEdge1})/(\text{redEdge2} + \text{redEdge1})$                                                                                                                                                                                                                 | [67]      |
| NDREI2 | Normalized Difference Red Edge Index 2       | $(\text{redEdge3} - \text{redEdge1})/(\text{redEdge3} + \text{redEdge1})$                                                                                                                                                                                                                 | [72]      |
| NDVI*  | Normalized Difference Vegetation Index       | $(\text{nir} - \text{red})/(\text{nir} + \text{red})$                                                                                                                                                                                                                                     | [73]      |
| NDWI   | Normalized Difference Water Index            | $(\text{green} - \text{nir})/(\text{green} + \text{nir})$                                                                                                                                                                                                                                 | [74]      |
| NDWI2  | Normalized Difference Water Index            | $(\text{nir} - \text{swir2})/(\text{nir} + \text{swir2})$                                                                                                                                                                                                                                 | [75]      |
| NRVI   | Normalized Ratio Vegetation Index            | $(\text{red}/\text{nir} - 1)/(\text{red}/\text{nir} + 1)$                                                                                                                                                                                                                                 | [76]      |
| RECI*  | Red-Edge Chlorophyll Index                   | $(\text{nir}/\text{redEdge}) - 1$                                                                                                                                                                                                                                                         | [58]      |
| REIP   | Red-Edge Inflection Point                    | $0.705 + 0.35 * ((\text{red} + \text{redEdge3})/(2 - \text{redEdge1}))/(\text{redEdge2} - \text{redEdge1})$                                                                                                                                                                               | [76]      |
| RVI    | Ratio Vegetation Index                       | $\text{red}/\text{nir}$                                                                                                                                                                                                                                                                   |           |
| SATVI  | Soil-Adjusted Total Vegetation Index         | $(\text{swir2} - \text{red})/(\text{swir2} + \text{red} + L) * (1 + L) - (\text{swir3}/2)$                                                                                                                                                                                                | [77]      |
| SAVI*  | Soil-Adjusted Vegetation Index               | $(\text{nir} - \text{red}) * (1 + L)/(\text{nir} + \text{red} + L)$                                                                                                                                                                                                                       | [78]      |
| SLAVI  | Specific Leaf Area Vegetation Index          | $\text{nir}/(\text{red} + \text{swir2})$                                                                                                                                                                                                                                                  | [79]      |
| SR*    | Simple Ratio Vegetation Index                | $\text{nir}/\text{red}$                                                                                                                                                                                                                                                                   | [80]      |
| TTVI*  | Thiam's Transformed Vegetation Index         | $\sqrt{\text{abs}((\text{nir} - \text{red})/(\text{nir} + \text{red}) + 0.5)}$                                                                                                                                                                                                            | [81]      |
| TVI    | Transformed Vegetation Index                 | $\sqrt{((\text{nir} - \text{red})/(\text{nir} + \text{red}) + 0.5)}$                                                                                                                                                                                                                      | [82]      |
| WDVI   | Weighted Difference Vegetation Index         | $\text{nir} - s * \text{red}$                                                                                                                                                                                                                                                             | [63]      |

Table S2. Confusion matrices of RF and SVM for the combination of the optical and SAR datasets.

| Random Forest (RF) Confusion Matrix |        |          |         |        |           |       |                      |       |                      |
|-------------------------------------|--------|----------|---------|--------|-----------|-------|----------------------|-------|----------------------|
| Prediction                          | Banana | Building | Cassava | Forest | Grassland | Maize | Bare ground/<br>road | Water | Producer<br>Accuracy |
| Banana                              | 195    | 18       | 7       | 9      | 8         | 4     | 10                   | 0     | 77.7                 |
| Building                            | 7      | 87       | 0       | 0      | 0         | 0     | 9                    | 0     | 84.5                 |
| Cassava                             | 3      | 0        | 157     | 4      | 16        | 17    | 4                    | 0     | 78.1                 |

|                    |      |      |      |      |      |      |      |       |       |
|--------------------|------|------|------|------|------|------|------|-------|-------|
| Forest/Vegetation  | 16   | 0    | 10   | 900  | 36   | 2    | 4    | 0     | 93.0  |
| Grassland          | 5    | 0    | 13   | 45   | 417  | 8    | 4    | 0     | 84.8  |
| Maize              | 4    | 2    | 11   | 3    | 19   | 146  | 17   | 0     | 72.3  |
| Bareground/Road    | 5    | 21   | 2    | 0    | 14   | 14   | 91   | 0     | 61.9  |
| Others             | 0    | 0    | 0    | 0    | 0    | 0    | 0    | 1257  | 100.0 |
| User accuracy (UA) | 83.0 | 68.0 | 78.5 | 93.7 | 81.8 | 76.4 | 65.5 | 100.0 |       |

Overall accuracy (OA): 89.8 and Kappa coefficient (KC):86.8

|                                               |      |      |      |      |      |      |      |       |       |
|-----------------------------------------------|------|------|------|------|------|------|------|-------|-------|
| Support Vector Machine (SVM) confusion matrix |      |      |      |      |      |      |      |       |       |
| Banana                                        | 174  | 21   | 9    | 9    | 10   | 3    | 13   | 0     | 72.8  |
| Building                                      | 11   | 83   | 0    | 0    | 0    | 0    | 9    | 0     | 80.6  |
| Cassava                                       | 5    | 0    | 153  | 7    | 19   | 21   | 4    | 0     | 73.2  |
| Forest/Vegetation                             | 25   | 0    | 11   | 904  | 26   | 3    | 4    | 0     | 92.9  |
| Grassland                                     | 6    | 0    | 11   | 39   | 420  | 8    | 3    | 0     | 86.2  |
| Maize                                         | 10   | 1    | 13   | 2    | 26   | 144  | 17   | 0     | 67.6  |
| Bareground/Road                               | 4    | 23   | 3    | 0    | 9    | 12   | 89   | 0     | 63.6  |
| Water                                         | 0    | 0    | 0    | 0    | 0    | 0    | 0    | 1257  | 100.0 |
| UA                                            | 74.0 | 64.8 | 76.5 | 94.1 | 82.4 | 75.4 | 64.0 | 100.0 |       |

Overall accuracy (OA): 89.0 and Kappa coefficient (KC):85.9

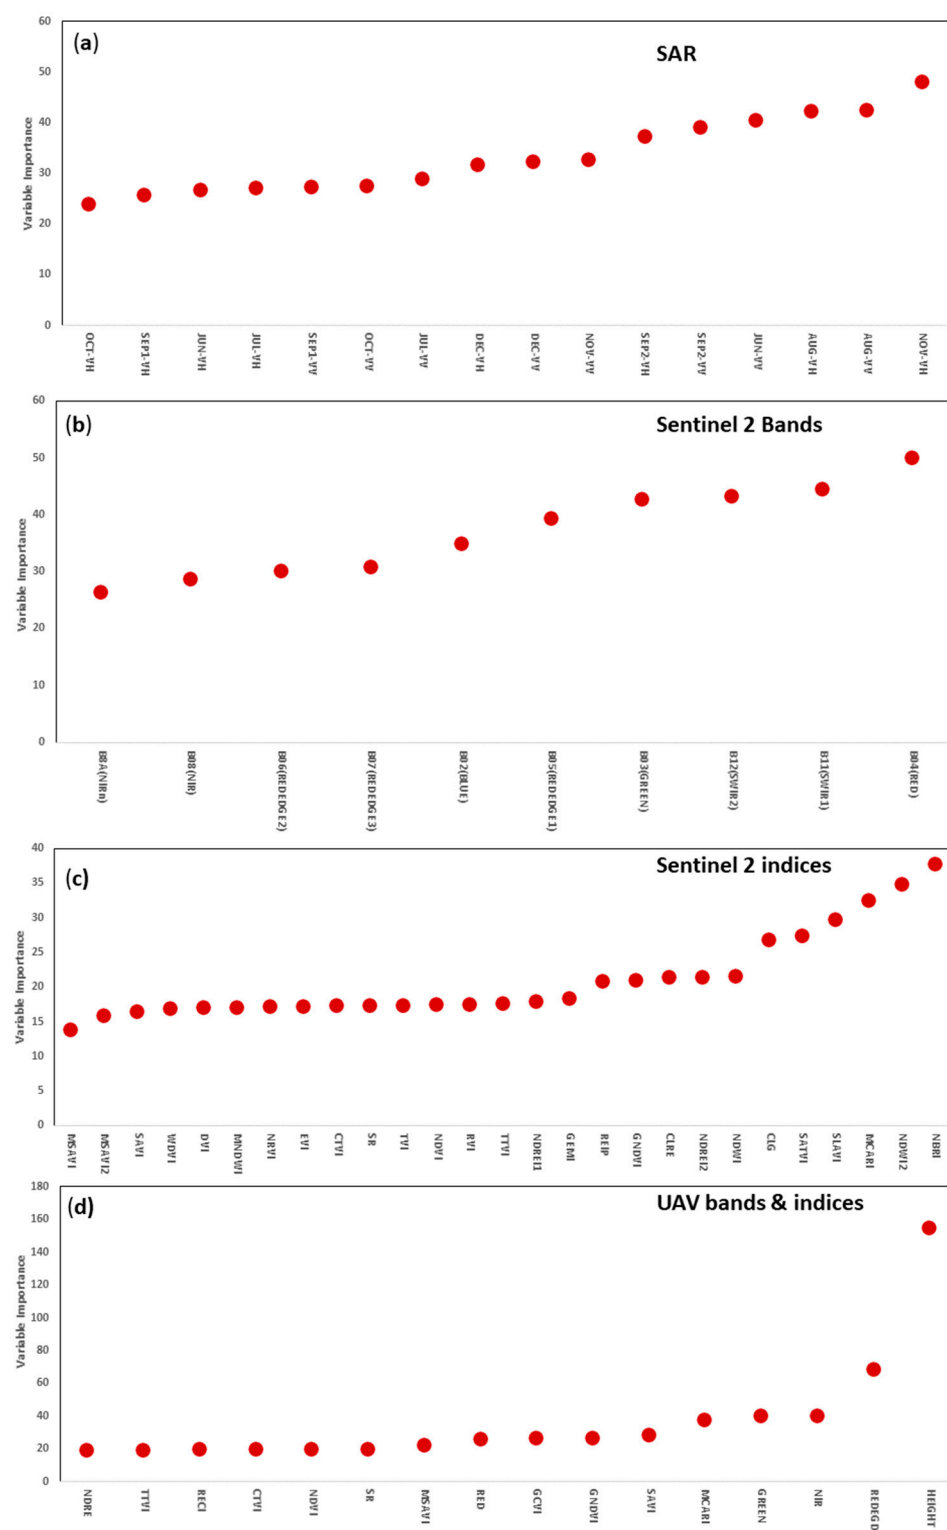

**Figure S1.** The importance ranking of the predictor variables of Random Forest using the Boruta package: (a) SAR dataset, (b) Sentinel 2A spectral bands, (c) Sentinel 2A vegetation indices, and (d) UAV spectral bands and vegetation indices.

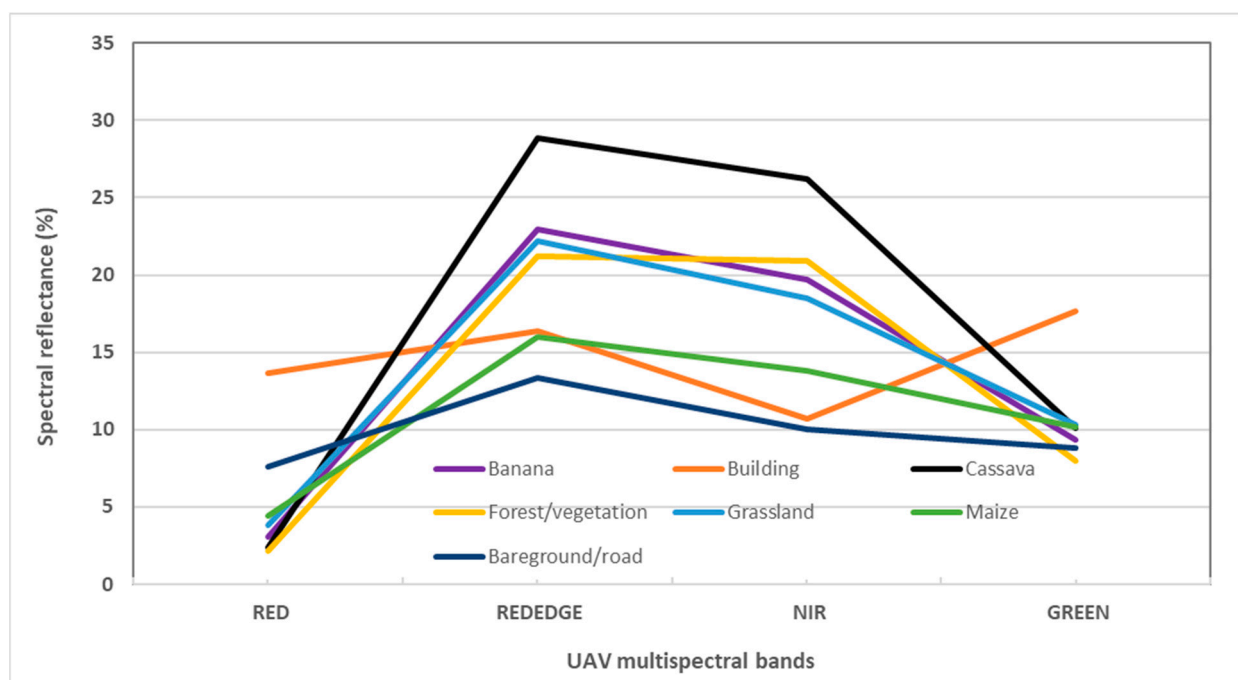

**Figure S2.** Spectral profile of UAV multispectral reflectance bands for the major landcover types in the study area.

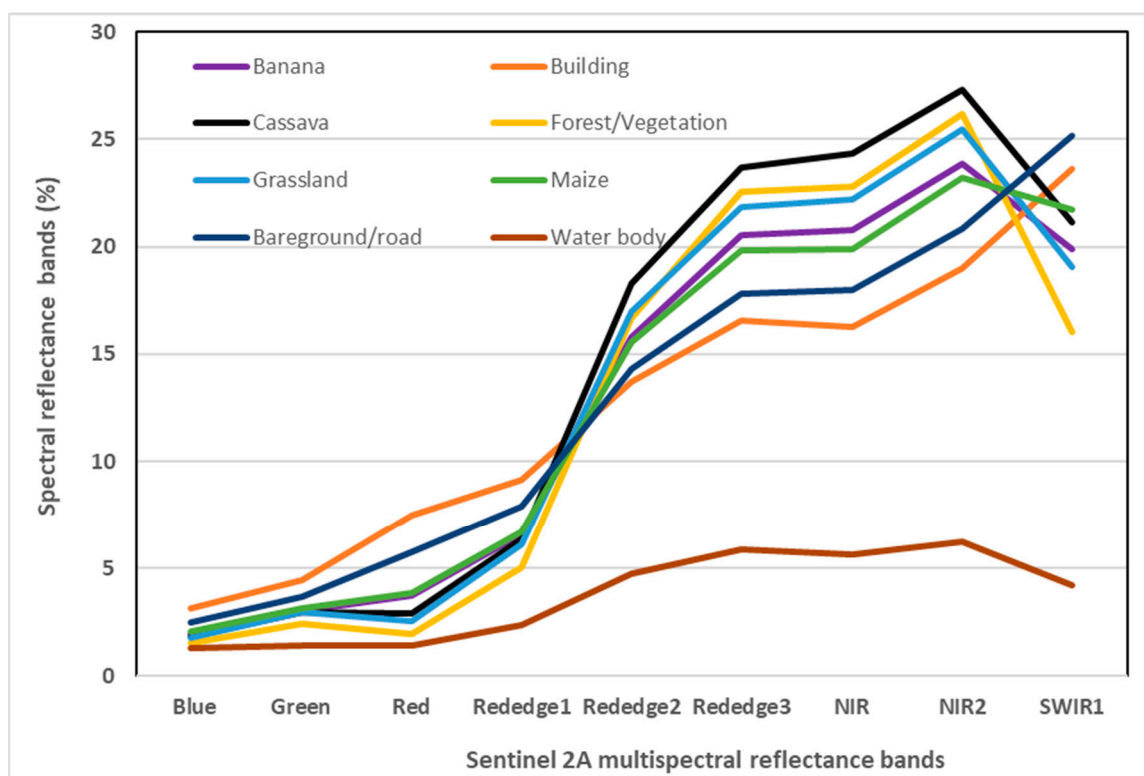

**Figure S3.** Spectral profile of Sentinel 2A multispectral reflectance bands for the major landcover types in the study area.
